# Supplementary material for: Caspase-3 expression in tumorigenesis and prognosis of buccal mucosa squamous cell carcinoma
Source: PubMed Central journal article supplement (PMC5663591; doi:10.18632/oncotarget.20494), 2017-08-24
Supplement: oncotarget-08-84237-s001.pdf [file oncotarget-08-84237-s001.pdf]

## Caspase-3 expression in tumorigenesis and prognosis of buccal mucosa squamous cell carcinoma

### SUPPLEMENTARY MATERIALS

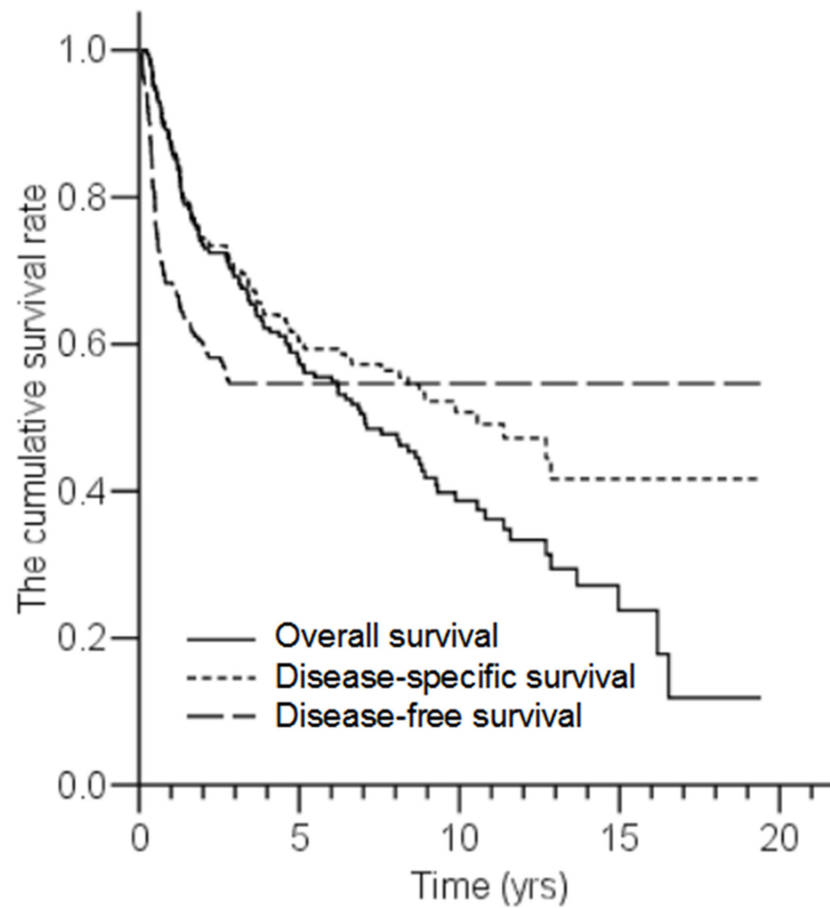

Supplementary Figure 1: Cumulative survival rate for patients with BMSCC.

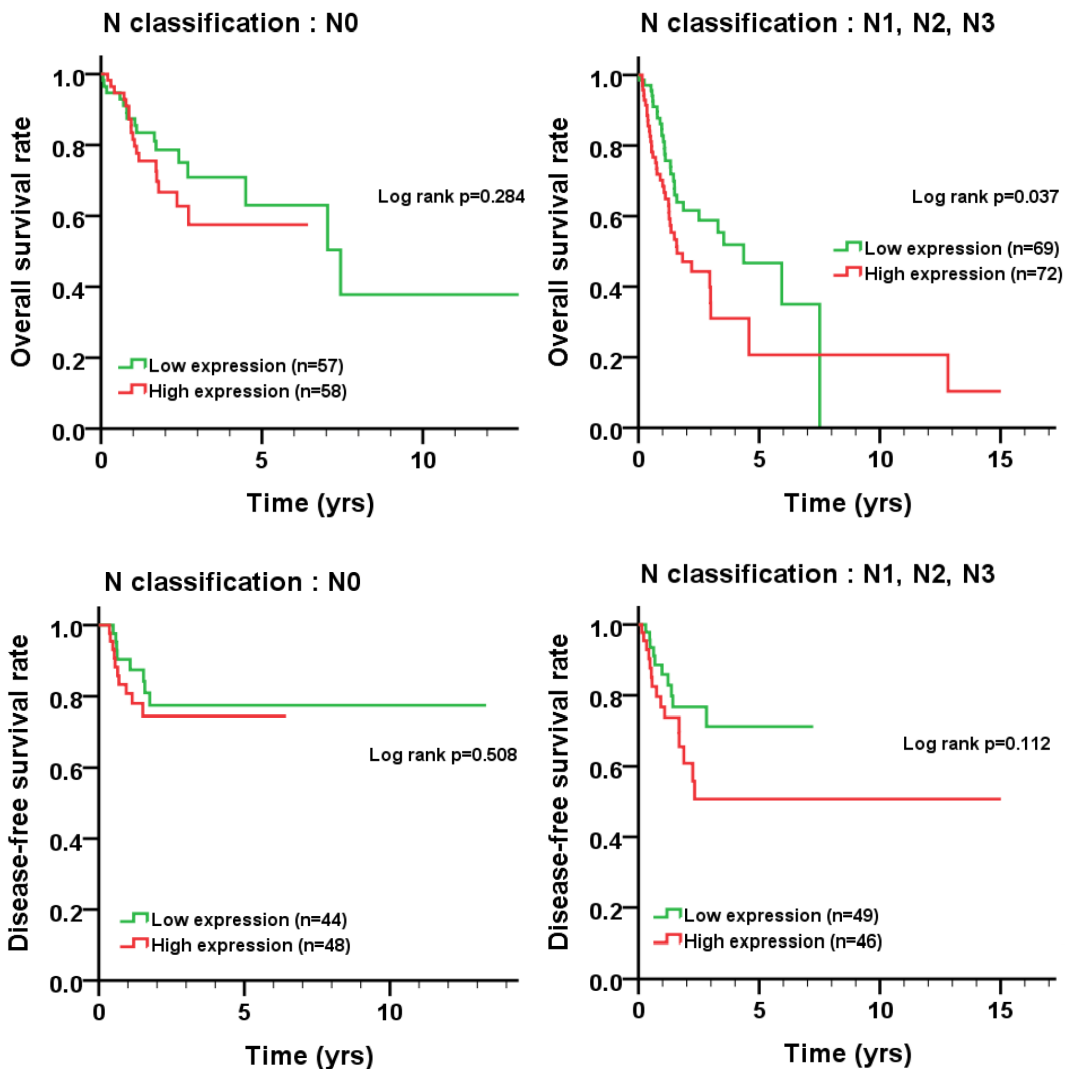

Supplementary Figure 2: Survival curves depicting overall survival and disease-free survival according to caspase-3 expression pattern in oral cancer patients without (N0) and with (N+N2+N3) lymph node metastasis from TCGA database.

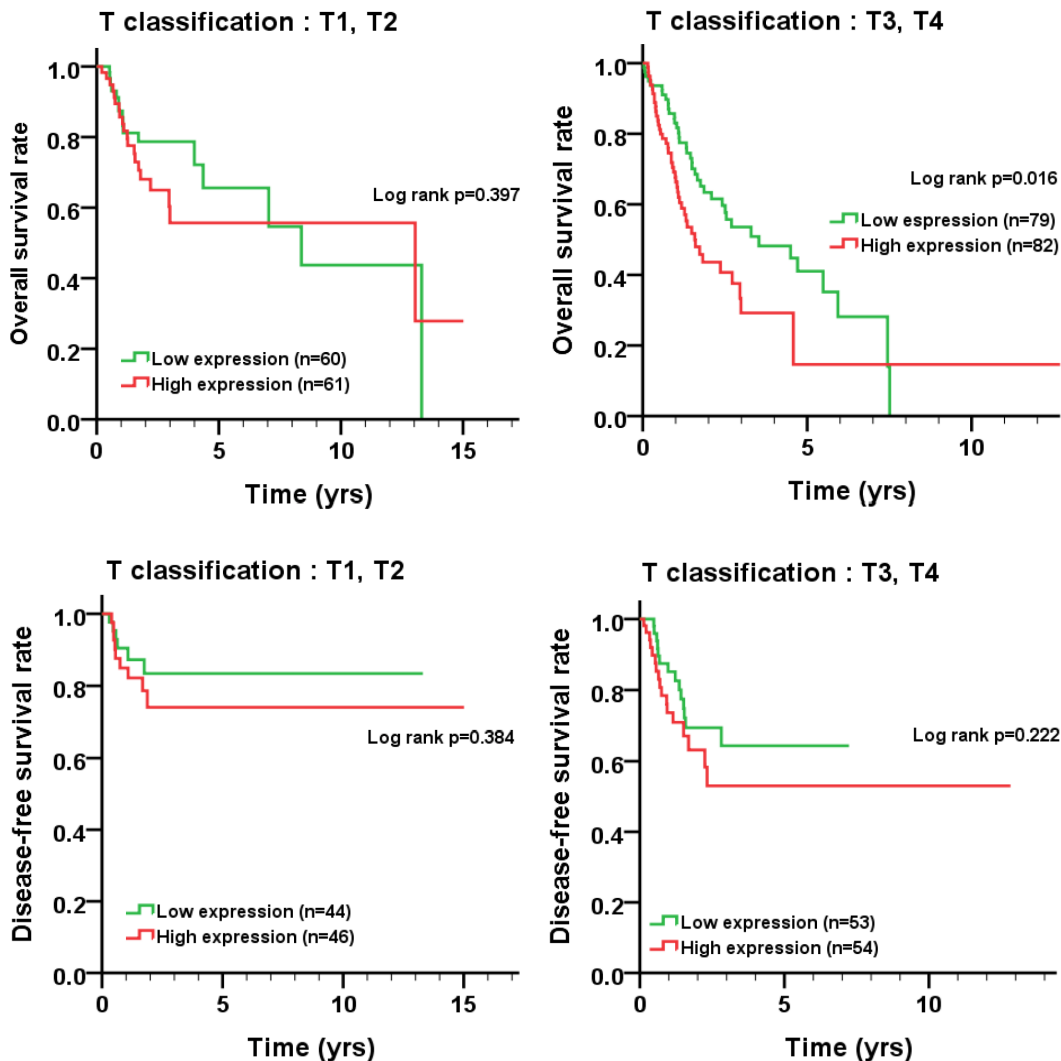

Supplementary Figure 3: Survival curves depicting overall survival and disease-free survival according to caspase-3 expression pattern in oral cancer patients with small (T1+T2) and larger (T3+T4) tumor size from TCGA database.

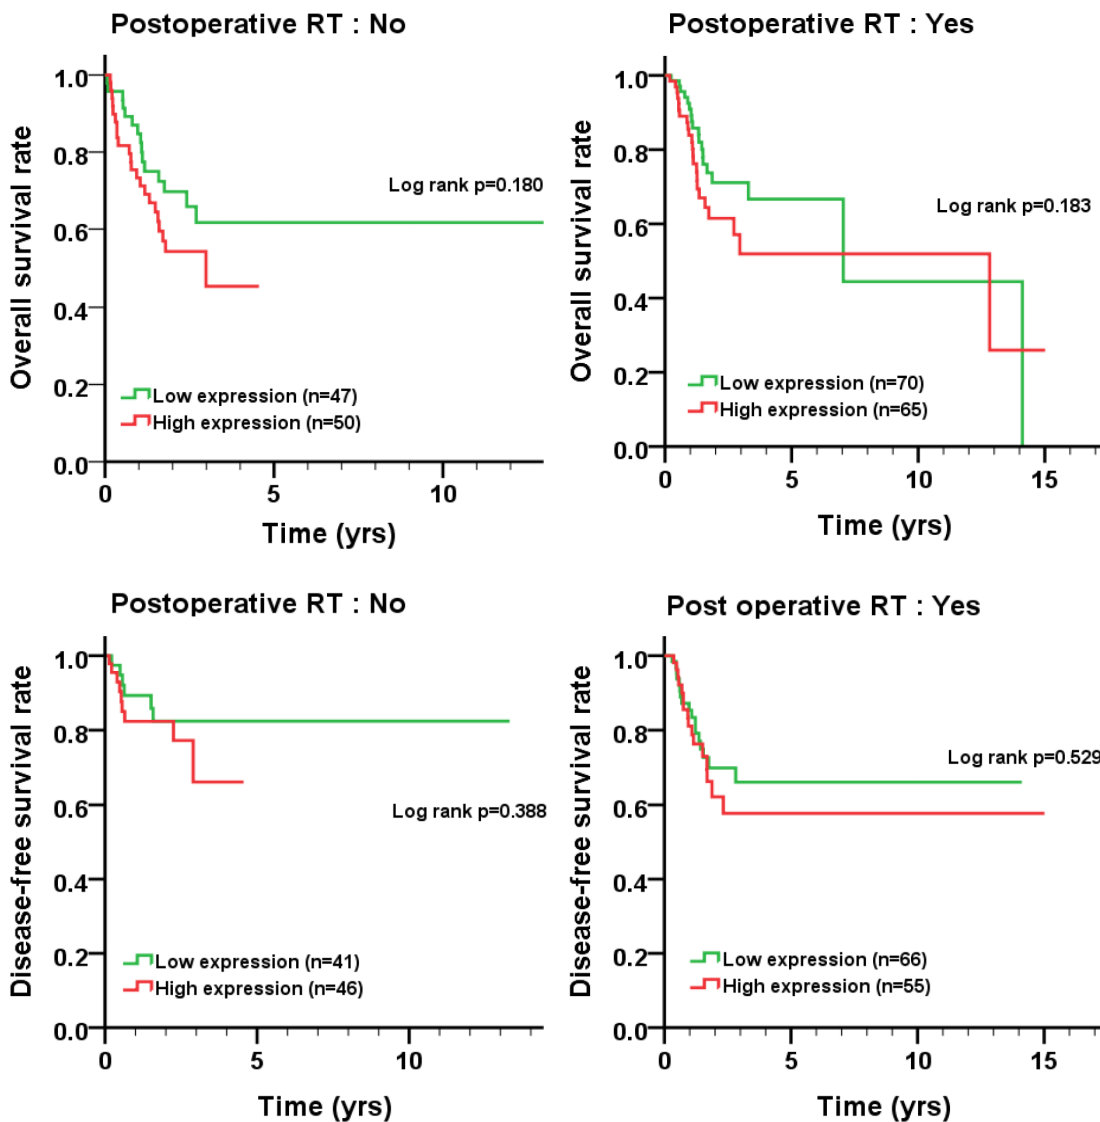

Supplementary Figure 4: Survival curves depicting overall survival and disease-free survival according to caspase-3 expression pattern in oral cancer patients without (No) and with (Yes) postoperative RT from TCGA database.

**Supplementary Table 1: Demographical characteristics and pathological outcomes and disease-specific survival of BMSCC patients**

| Variable                | No. | CHR         | <i>p</i> -Value* |
|-------------------------|-----|-------------|------------------|
| Sex                     |     |             |                  |
| Female                  | 4   | 1.00        |                  |
| Male                    | 181 | 0.49        | 0.227            |
| Age, y                  |     |             |                  |
| ≤ 40                    | 25  | 1.00        |                  |
| 41-50                   | 58  | 1.49        | 0.301            |
| 51-60                   | 56  | 1.53        | 0.272            |
| >60                     | 46  | 1.47        | 0.327            |
| Cell differentiation    |     |             |                  |
| Well                    | 51  | 1.00        |                  |
| Moderate                | 125 | <b>1.70</b> | <b>0.045</b>     |
| Poor                    | 9   | <b>5.32</b> | <b>&lt;0.001</b> |
| AJCC pathological stage |     |             |                  |
| I                       | 65  | 1.00        |                  |
| II                      | 47  | 1.30        | 0.428            |
| III                     | 19  | <b>2.81</b> | <b>0.006</b>     |
| IV                      | 54  | <b>4.48</b> | <b>&lt;0.001</b> |
| T classification        |     |             |                  |
| T1                      | 70  | 1.00        |                  |
| T2                      | 70  | <b>2.14</b> | <b>0.005</b>     |
| T3                      | 12  | <b>4.58</b> | <b>&lt;0.001</b> |
| T4                      | 33  | <b>3.20</b> | <b>&lt;0.001</b> |
| N classification        |     |             |                  |
| N0                      | 141 | 1.00        |                  |
| N1                      | 19  | <b>2.90</b> | <b>&lt;0.001</b> |
| N2                      | 25  | <b>5.69</b> | <b>&lt;0.001</b> |
| Postoperative RT        |     |             |                  |
| No                      | 134 | 1.00        |                  |
| Yes                     | 51  | <b>2.31</b> | <b>&lt;0.001</b> |
| Postoperative CT        |     |             |                  |
| No                      | 181 | 1.00        |                  |
| Yes                     | 4   | 0.57        | 0.573            |

AJCC, American Joint Committee on Cancer; CHR, crude hazard ratio; RT, radiotherapy; CT, chemotherapy.

\**p* values were estimated by Cox's regression.

Supplementary Table 2: The score ratios of caspase-3 in CTAN/tumor tissues of BMSCC patients

| Cleaved caspase-3 (CC-3) |                 |            |                       |
|--------------------------|-----------------|------------|-----------------------|
| CTAN/tumor ratio         | Patient numbers | Percentage | Cumulative percentage |
| 0.00                     | 62              | 39.1       | 98.1                  |
| 2.00                     | 1               | 0.8        |                       |
| Total                    | 53              | 39.8       |                       |
| Missing value            | 80              | 60.2       |                       |
| Total                    | 133             | 100.0      |                       |
| Caspase-3 (C-3)          |                 |            |                       |
| CTAN/tumor ratio         | Patient numbers | Percentage | Cumulative percentage |
| 0.00                     | 36              | 24.0       | 24.8                  |
| 0.29                     | 1               | 0.7        | 25.5                  |
| 0.33                     | 5               | 3.3        | 29.0                  |
| 0.40                     | 7               | 4.7        | 33.8                  |
| 0.50                     | 9               | 6.0        | 40.0                  |
| 0.57                     | 2               | 1.3        | 41.4                  |
| 0.60                     | 4               | 2.7        | 44.1                  |
| 0.67                     | 6               | 4.0        | 48.3                  |
| 0.75                     | 7               | 4.7        | 53.1                  |
| 0.80                     | 8               | 5.3        | 58.6                  |
| 0.83                     | 14              | 9.3        | 68.3                  |
| 0.86                     | 2               | 1.3        | 69.7                  |
| 1.00                     | 26              | 17.3       |                       |
| 1.20                     | 5               | 3.3        |                       |
| 1.25                     | 4               | 2.7        |                       |
| 1.33                     | 1               | 0.7        |                       |
| 1.50                     | 2               | 1.3        |                       |
| 1.67                     | 2               | 1.36       |                       |
| 2.00                     | 4               | 2.7        |                       |
| Total                    | 145             | 96.7       |                       |
| Missing value            | 5               | 3.3        |                       |
| Total                    | 150             | 100.0      |                       |

**Supplementary Table 3: The comparison of caspase-3 expression between tumor adjacent normal and tumor tissues in oral cancer patients from TCGA database**

| Variables | Tumor adjacent normal   |        | Tumor                    |        | Z      | p-Value*     |
|-----------|-------------------------|--------|--------------------------|--------|--------|--------------|
|           | Mean±SD                 | Median | Mean±SD                  | Median |        |              |
|           | (n=29)                  |        | (n=303)                  |        |        |              |
| Caspase-3 | 66.44±8.65 <sup>d</sup> | 67.36  | 71.19±6.87 <sup>cd</sup> | 71.38  | -2.908 | <b>0.004</b> |

SD, standard deviation.

\*p values were estimated by Wilcoxon signed-rank test.

<sup>a</sup>p<0.001; <sup>b</sup>p<0.001; <sup>c</sup>p<0.001; <sup>d</sup>p<0.001; <sup>e</sup>p=0.011; <sup>f</sup>p=0.001.

Supplementary Table 4: Association of caspase-3 expression with pathological outcomes in oral cancer patients from TCGA database

| Variable                | No. (%)    | Caspase-3                 |        |                          |
|-------------------------|------------|---------------------------|--------|--------------------------|
|                         |            | Mean±SD                   | Median | <i>p</i> -Value          |
| Sex                     |            |                           |        |                          |
| Female                  | 100 (33.0) | 70.21±6.83                | 70.08  | 0.080*                   |
| Male                    | 203 (67.0) | 71.68±6.85                | 71.56  |                          |
| Age, y                  |            |                           |        |                          |
| ≤ 40                    | 13 (4.3)   | 66.70±6.13 <sup>abc</sup> | 67.01  | <b>0.006<sup>‡</sup></b> |
| 41-50                   | 37 (12.2)  | 71.76±5.96 <sup>a</sup>   | 71.21  |                          |
| 51-60                   | 81 (26.7)  | 71.58±6.58 <sup>b</sup>   | 71.65  |                          |
| 61-70                   | 92 (30.4)  | 69.85±7.25 <sup>d</sup>   | 70.14  |                          |
| >70                     | 80 (26.4)  | 72.82±6.76 <sup>cd</sup>  | 72.92  |                          |
| Cell differentiation    |            |                           |        |                          |
| Well                    | 48 (16.0)  | 69.59±6.65                | 69.60  | 0.173 <sup>‡</sup>       |
| Moderate                | 191 (63.7) | 71.36±6.56                | 71.49  |                          |
| Poor                    | 61 (20.3)  | 71.95±7.65                | 72.65  |                          |
| AJCC pathological stage |            |                           |        |                          |
| I, II                   | 76 (27.1)  | 71.41±6.33                | 71.21  | 0.772*                   |
| III, IV                 | 204 (72.9) | 71.15±6.73                | 71.41  |                          |
| T classification        |            |                           |        |                          |
| T1, T2                  | 123 (43.2) | 71.44±6.53                | 71.39  | 0.629*                   |
| T3, T4                  | 162 (56.8) | 71.06±6.75                | 71.43  |                          |
| N classification        |            |                           |        |                          |
| N0                      | 117 (45.7) | 71.00±6.11                | 71.43  | 0.733*                   |
| N1, N2                  | 139 (54.3) | 71.29±7.00                | 71.39  |                          |

AJCC, American Joint Committee on Cancer.

\**p* values were estimated by student's T test.

<sup>†</sup>*p* values were estimated by Kruskal-Wallis 1-way ANOVA test.

<sup>‡</sup>*p* values were estimated by 1-way ANOVA test.

<sup>§</sup>*p* values were estimated by Mann-Whitney U test.

<sup>a</sup>*p*=0.022; <sup>b</sup>*p*=0.017; <sup>c</sup>*p*=0.003; <sup>d</sup>*p*=0.002.



**Supplementary Table 5: The expression levels of caspase-3 for overall survival and disease-free survival in oral cancer patients from TCGA database**

| Variable             | No. (%) | Overall survival |                         |              |                              | Disease-free survival |                  |              |                              |       |
|----------------------|---------|------------------|-------------------------|--------------|------------------------------|-----------------------|------------------|--------------|------------------------------|-------|
|                      |         | CHR (95% CI)     | <i>p</i> -Value         | AHR (95% CI) | <i>p</i> -Value <sup>*</sup> | CHR (95% CI)          | <i>p</i> -Value  | AHR (95% CI) | <i>p</i> -Value <sup>†</sup> |       |
| Caspase-3 expression | Low     | 150 (50.0)       | 1.00                    |              | 1.00                         |                       | 1.00             |              | 1.00                         |       |
|                      | High    | 150 (50.0)       | <b>1.52 (1.07–2.16)</b> | <b>0.020</b> | 1.45 (0.92–2.78)             | 0.107                 | 1.39 (0.80–2.43) | 0.246        | 1.25 (0.71–2.19)             | 0.446 |

AJCC, American Joint Committee on Cancer; CHR, crude hazard ratio; CI, confidence interval; AHR, adjusted hazard ratio.  
<sup>\*</sup>*p*-value were adjusted for cell differentiation (moderate, poor vs. well), AJCC pathological stage (stage II, III, IV vs stage I), postoperative RT by multiple Cox's regression.  
<sup>†</sup>*p*-value were adjusted for cell differentiation (moderate, poor vs. well), AJCC pathological stage (stage II, III, IV vs stage I) by multiple Cox's regression.

**Supplementary Table 6: Distribution of scores for cleaved caspase-3 and caspase-3 expression in BMSCC patients**

| <b>Cleaved caspase-3 (CC-3)</b> |               |                   |                              |
|---------------------------------|---------------|-------------------|------------------------------|
| <b>Score</b>                    | <b>Number</b> | <b>Percentage</b> | <b>Cumulative percentage</b> |
| 0.00                            | 114           | 61.6              | 61.6                         |
| 1.00                            | 13            | 7.0               | 68.6                         |
| 2.00                            | 36            | 19.5              | 88.1                         |
| 3.00                            | 16            | 8.6               | 96.8                         |
| 4.00                            | 6             | 3.2               | 100.0                        |
| Total                           | 185           | 100.0             |                              |
| <b>Caspse-3 (C-3)</b>           |               |                   |                              |
| <b>Score</b>                    | <b>Number</b> | <b>Percentage</b> | <b>Cumulative percentage</b> |
| 0.00                            | 5             | 2.7               | 2.7                          |
| 2.00                            | 13            | 7.0               | 9.7                          |
| 3.00                            | 19            | 10.3              | 20.0                         |
| 4.00                            | 37            | 20.0              | 40.0                         |
| 5.00                            | 60            | 32.4              | 72.4                         |
| 6.00                            | 46            | 24.9              | 97.3                         |
| 7.00                            | 5             | 2.7               | 100.0                        |
| Total                           | 185           | 100.0             |                              |
